# Supplementary material for: An Updated Meta-analysis of Studies Comparing Conventional to Underwater Endoscopic Mucosal Resection for Colorectal Polyps
Source: bioRxiv or medRxiv preprint supplement (doi:10.1101/2022.05.17.22275225), 2022-05-21

## Supplementary Fig. 1 : PRISMA flowsheet for data selection

Page MJ, McKenzie JE, Bossuyt PM, Boutron I, Hoffmann TC, Mulrow CD, et al. The PRISMA 2020 statement: an updated guideline for reporting systematic reviews. *BMJ* 2021;372:n71. doi: 10.1136/bmj.n71

PRISMA 2020 flow diagram

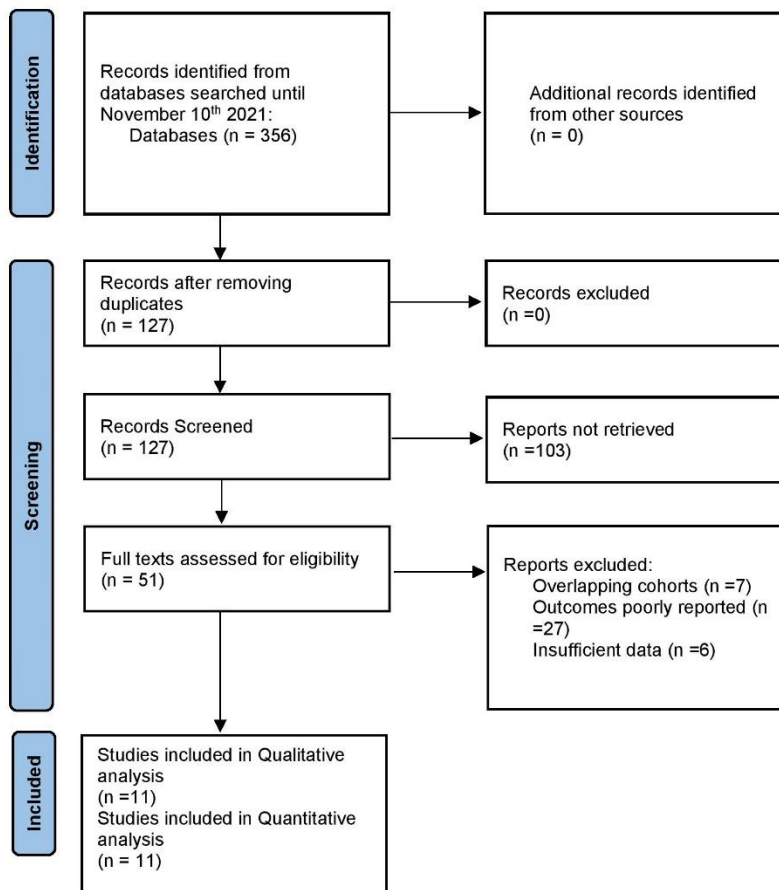

Supplementary Table 1. Newcastle-ottawa scale (NOS) table summarizing the non-randomized studies included in our analysis.

Supplementary Table 1. NOS for the risk of bias and quality assessment of NRSs

| Author           | Year | Selection                            |                                     |                       | Comparability          |                                             | Exposure                  |                                               | Total score |
|------------------|------|--------------------------------------|-------------------------------------|-----------------------|------------------------|---------------------------------------------|---------------------------|-----------------------------------------------|-------------|
|                  |      | Adequate definition of patient cases | Representativeness of patient cases | Selection of controls | Definition of controls | Control for important or additional factors | Ascertainment of exposure | Same method of ascertainment for participants |             |
| Liverani et al.  | 2016 | *                                    | *                                   |                       | *                      | *                                           | *                         | *                                             | 6           |
| Cadoni et al.    | 2017 | *                                    | *                                   |                       | *                      | **                                          | *                         | *                                             | 7           |
| Chien et al.     | 2017 | *                                    | *                                   |                       | *                      | **                                          | *                         | *                                             | 7           |
| Schenck et al.   | 2017 | *                                    | *                                   |                       | *                      | **                                          | *                         | *                                             | 7           |
| Rodriguez et al. | 2019 | *                                    | *                                   |                       | *                      | **                                          | *                         | *                                             | 7           |
| Mouchli et al.   | 2019 | *                                    | *                                   |                       | *                      | **                                          | *                         | *                                             | 7           |

NOS, Newcastle-Ottawa scale; NRS, non-randomized study.

Supplementary Fig 2. A revised Cochrane risk-of-bias tool for randomized trials included in our analysis.

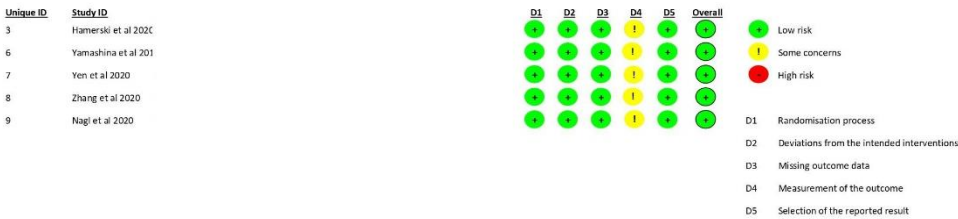

Supplement: Supplementary file [file media-1.pdf]
